# Supplementary material
Source: publisher figshare collection journal article supplement (https://sage.figshare.com/ndownloader/files/21748365)
Supplement: Supplementary file 1 [file 21748365]

## **Supplemental Material**

### **Transcriptomic and Functional Studies Reveal Undermined Chemotactic and Angiostimulatory Properties of Aged Microglia During Stroke Recovery**

Lu Jiang<sup>1,\*</sup>, Hongfeng Mu<sup>1,\*</sup>, Fei Xu<sup>1,2</sup>, Di Xie<sup>1</sup>, Wei Su<sup>1</sup>, Jing Xu<sup>1</sup>, Zeyu Sun<sup>1</sup>, Silvia Liu<sup>3</sup>, Jianhua Luo<sup>3</sup>, Yejie Shi<sup>1</sup>, Rehana K. Leak<sup>4</sup>, Lawrence R. Wechsler<sup>1</sup>, Jun Chen<sup>1,2</sup>, Xiaoming Hu<sup>1,2</sup>

<sup>1</sup>Pittsburgh Institute of Brain Disorders and Recovery, Department of Neurology, University of Pittsburgh School of Medicine, Pittsburgh, Pennsylvania 15213, USA

<sup>2</sup>Geriatric Research, Education and Clinical Center, Veterans Affairs Pittsburgh Health Care System, Pittsburgh, Pennsylvania 15261, USA

<sup>3</sup>Department of Pathology, School of Medicine, University of Pittsburgh, Pittsburgh, Pennsylvania, 15213, USA

<sup>4</sup>Graduate School of Pharmaceutical Sciences, School of Pharmacy, Duquesne University, Pittsburgh, PA 15282, USA

**Running title:** Transcriptome analysis of aged microglia in stroke

LJ and HM contribute equally to this study.

\*Corresponding author: Dr. Xiaoming Hu, Department of Neurology, University of Pittsburgh School of Medicine, 200 Lothrop Street, SBST 506, Pittsburgh, PA 15213, USA. Tel: 412-648-8991. Fax: 412-383-9985. E-mail: hux2@upmc.edu

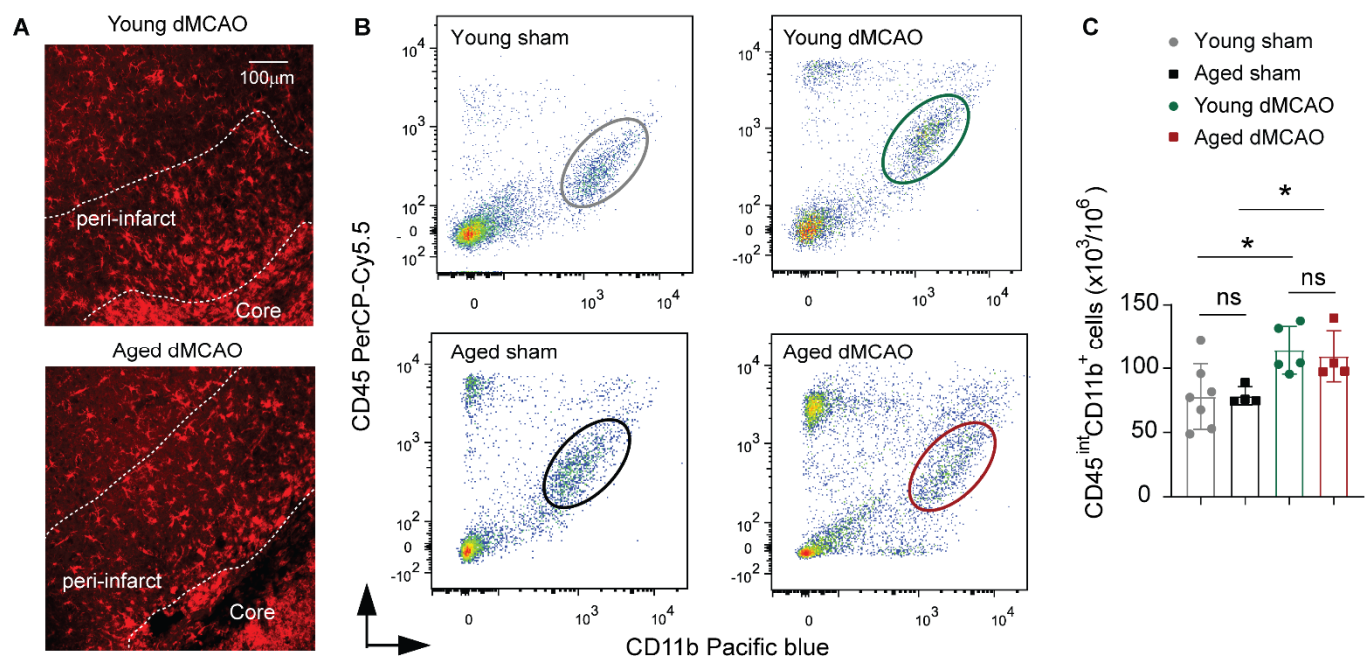

**Figure S1. Iba1 staining and flow cytometry analysis.** **A.** Immunostaining showing Iba1<sup>+</sup> cells in the ischemic core and peri-infarct areas in both young and aged mice 14 days after stroke. **B.** CD45<sup>int</sup>CD11b<sup>+</sup> microglia were collected from young and aged brains 14 days dMCAO surgery or with sham operation. **C.** Quantification of CD45<sup>int</sup>CD11b<sup>+</sup> microglia in young and aged mice after sham or dMCAO surgery. \*\* $p < 0.01$ , one-way ANOVA followed by Bonferroni *post hoc*.

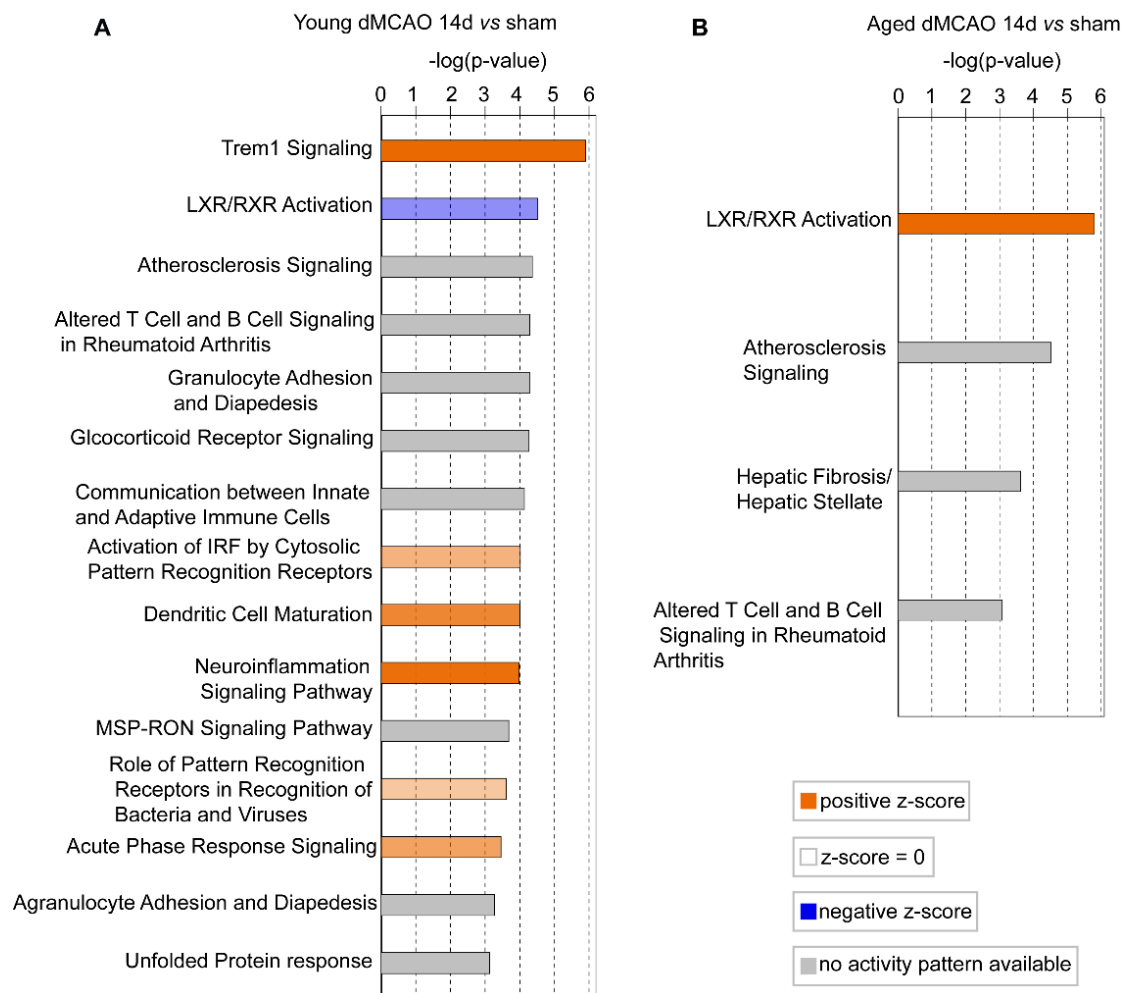

**Figure S2. IPA canonical pathway analysis reveals the top pathways changed in young (A) and aged (B) microglia 14 days after dMCAO.** Cut off p-value < 0.001. The bar charts represent the  $-\log_{10}(\text{p-value})$  calculated based on Fisher's exact test.

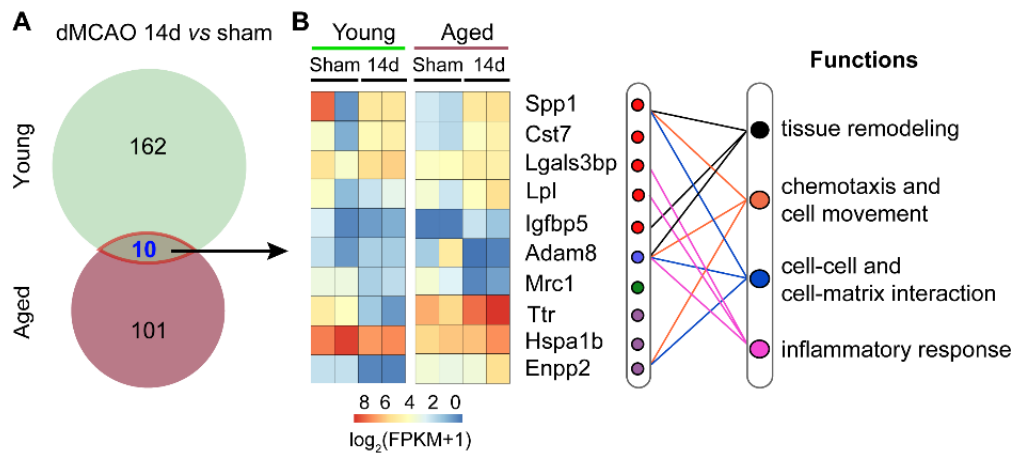

**Figure S3. DEGs that are significantly altered in both young and aged microglia at 14 days after stroke.** **A.** Venn diagram shows DEGs in young and aged microglia. There are 172 DEGs in young group and 111 DEGs in aged group, with 10 genes changed in both young and aged microglia. **B.** Heatmap shows the expression [ $\log_2(\text{FPKM}+1)$ ] of 10 DEGs in both young and aged microglia. The main functions of these genes are listed.

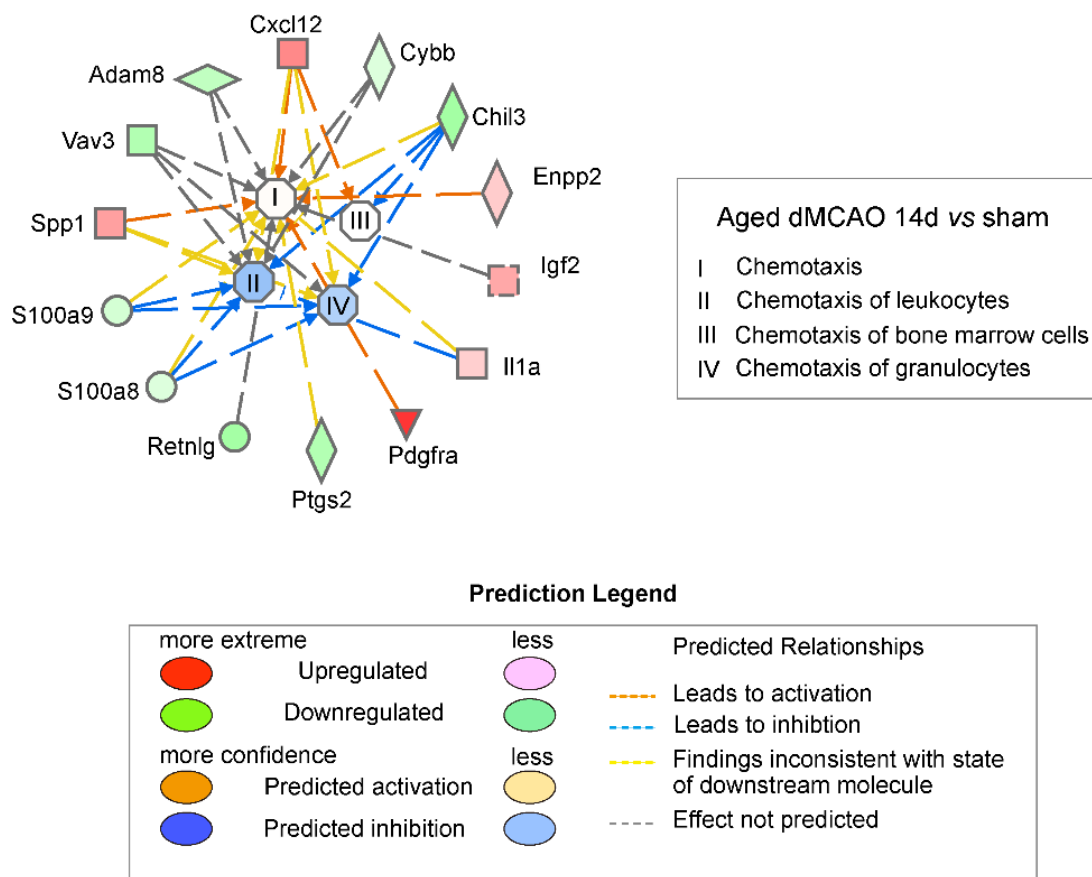

**Figure S4. Aged microglia show reduced chemotaxis 14 days after stroke.** IPA analysis identified chemotaxis-related functions enriched in aged microglia. The color of outer circle nodes indicates the expression of assigned genes. The color of inner circle nodes indicates the z-scores of enriched functions. The color of segments between gene nodes or function nodes implies gene activation or inhibition.

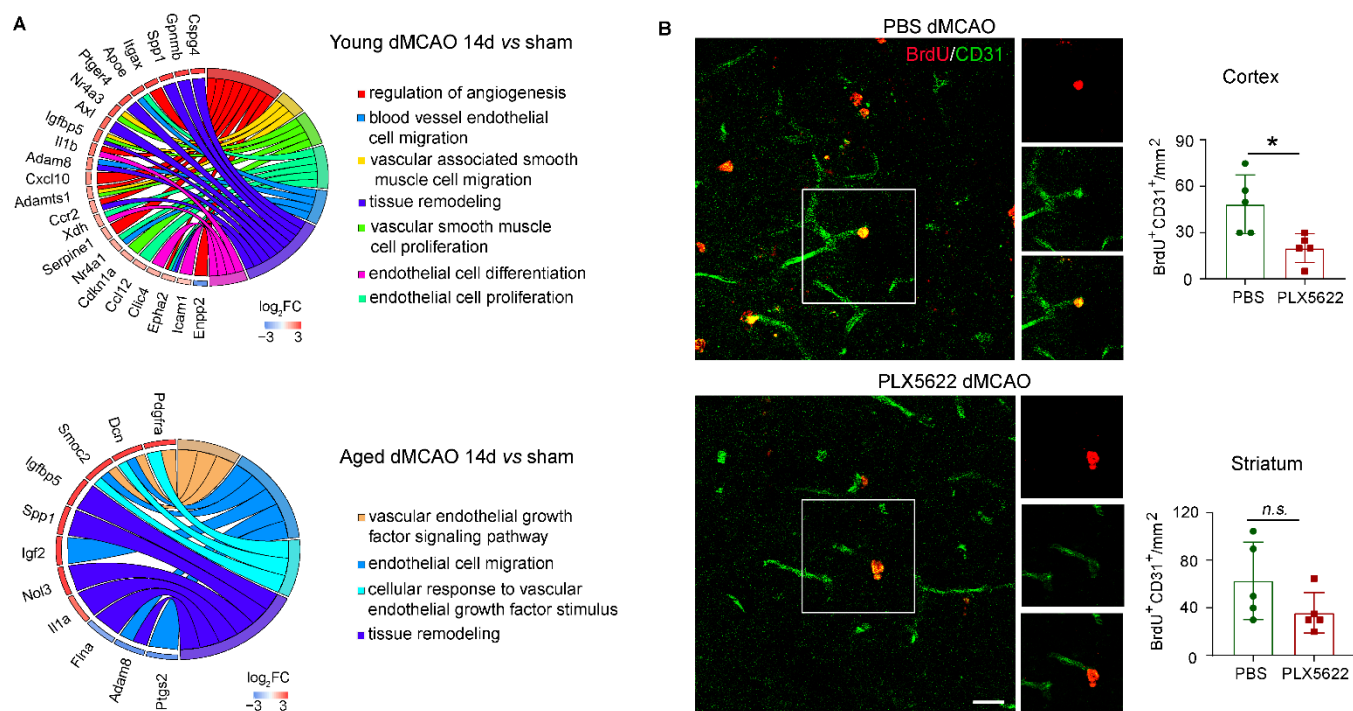

**Figure S5. Senescent microglia are associated with impaired angiogenesis after stroke. A.** Chord diagrams illustrate the DEGs (left semicircle) and enriched biological processes related to angiogenesis (right semicircle) in young (upper) and aged (lower) groups. The genes (rectangles) were linked to corresponding GO terms *via* colored ribbons. The expressions of genes were presented as log<sub>2</sub>(fold change) and listed according to color intensity in a descending order. Upregulated genes were displayed in red and downregulated in blue. **B.** Microglia/macrophages were depleted by dietary intake of PLX5622 7 days before 60 min MCAO. BrdU (red) and CD31 (green) double staining was performed 14 days after MCAO. Dual-labeled cells were quantified in the peri-infarct area in both cortex and striatum.

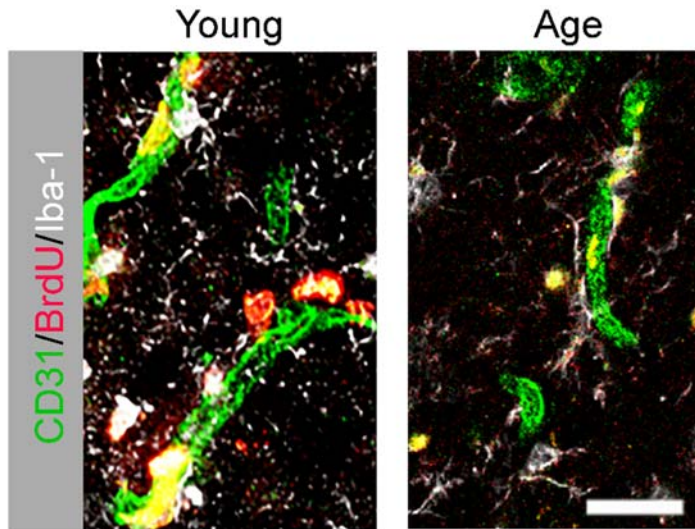

**Figure S6. Iba1<sup>+</sup> microglia/macrophages interact with BrdU<sup>+</sup>CD31<sup>+</sup> newly generated vessels in young and aged mice 14d after dMCAO. Scale bar: 40μm.**
